# Supplementary material for: A Systematic Investigation into Aging Related Genes in Brain and Their Relationship with Alzheimer’s Disease
Source: PubMed Central journal article supplement (PMC4777381; doi:10.1371/journal.pone.0150624), 2016-03-03
Supplement: pone.0150624.s001.pdf [file pone.0150624.s001.pdf]

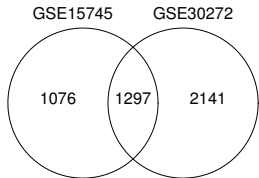

(a) DNA methylation sites

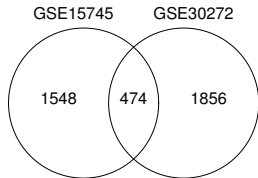

(b) Expressed genes
